# Supplementary material for: Head and Neck Cancer Cell Death due to Mitochondrial Damage Induced by Reactive Oxygen Species from Nonthermal Plasma-Activated Media: Based on Transcriptomic Analysis
Source: PubMed Central journal article supplement (PMC8281449; doi:10.1155/2021/9951712), 2021-07-06
Supplement: 9951712.f1.pdf [file 9951712.f1.pdf]

**Supplement Figure 1. Non-thermal plasma activated media (NTPAM) generation system and specification.**

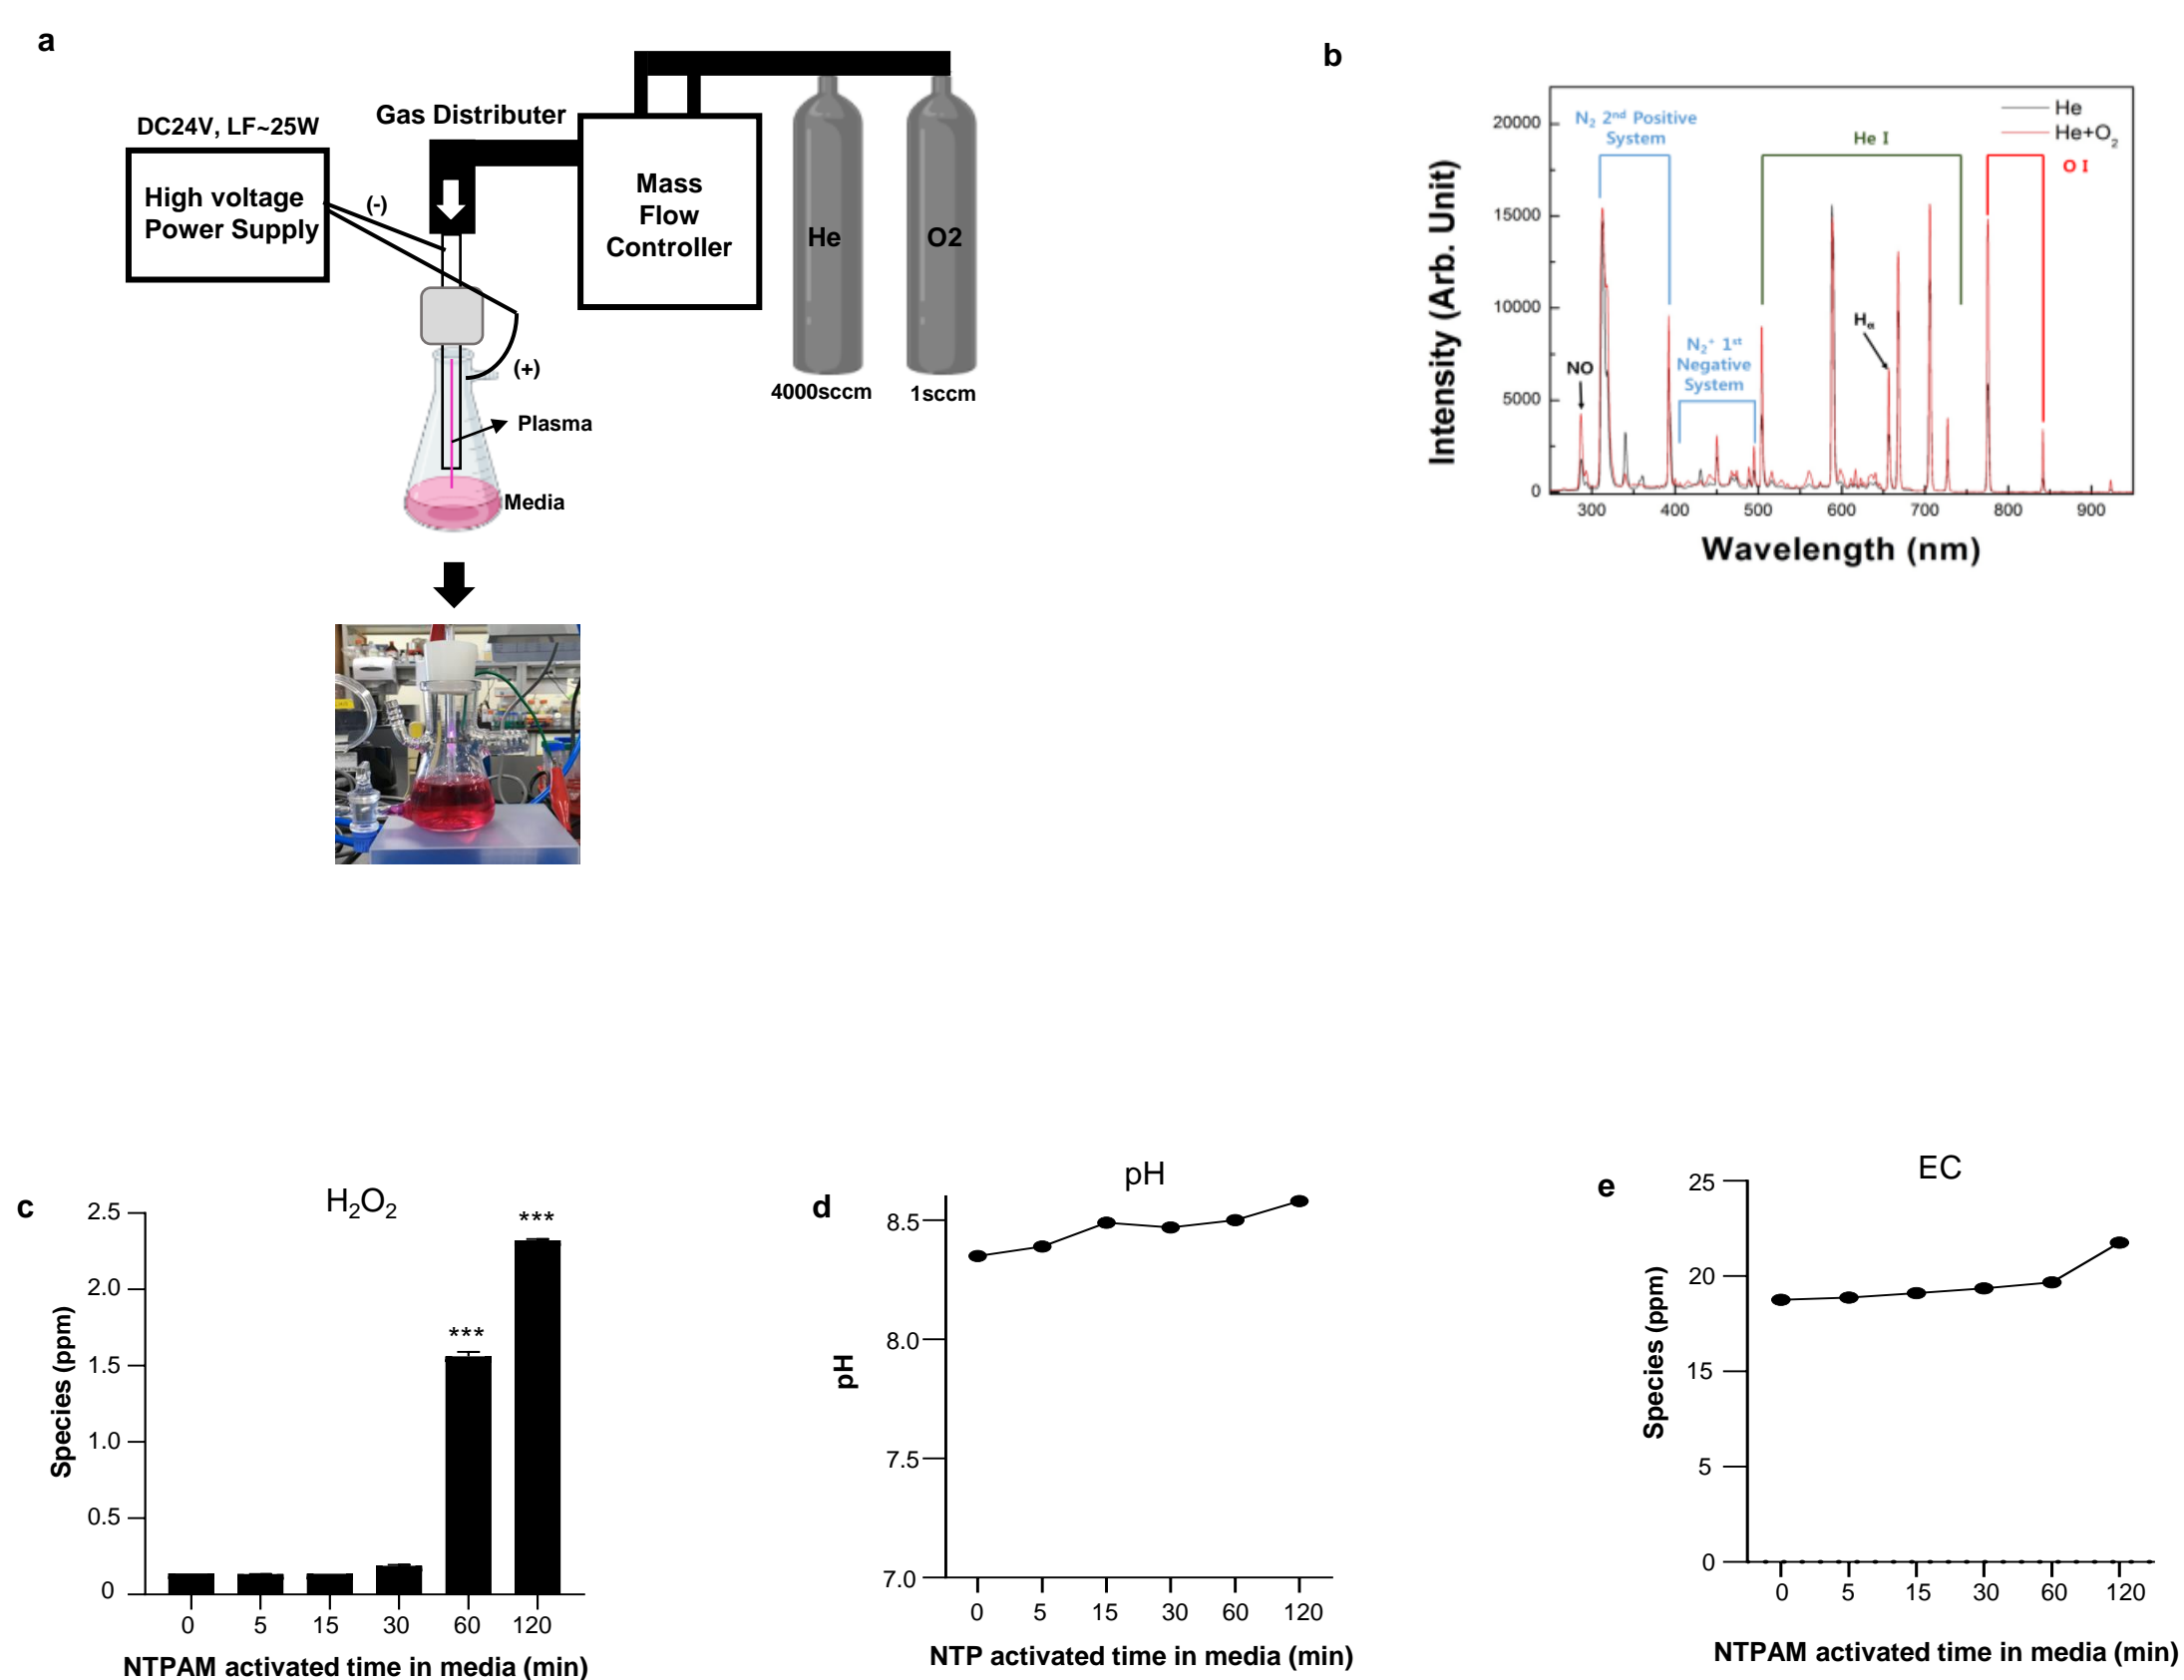

**Figure S1. Non-thermal plasma activated media (NTPAM) generation system and specification.** (a) Schematic illustration and photo of the NTPAM generation system. DC=Direct Current; LF=Low Frequency; SCCM=Standard Cubic Centimeter per Minute. (b) Optical emission spectra of the NTP according to the electric intensity (2 or 4 kV) in the range of 280–920 nm. (c) Change of H<sub>2</sub>O<sub>2</sub> value with NTP activated time in NTPAM. (d) Change of pH value with NTP activated time in NTPAM. (e) NTP activated time-dependent degree of electric conductivity (EC) in NTPAM.

**Supplement Figure 2. Oxygen consumption rate (OCR) measurement in human fibroblasts after NTPAM treatment.**

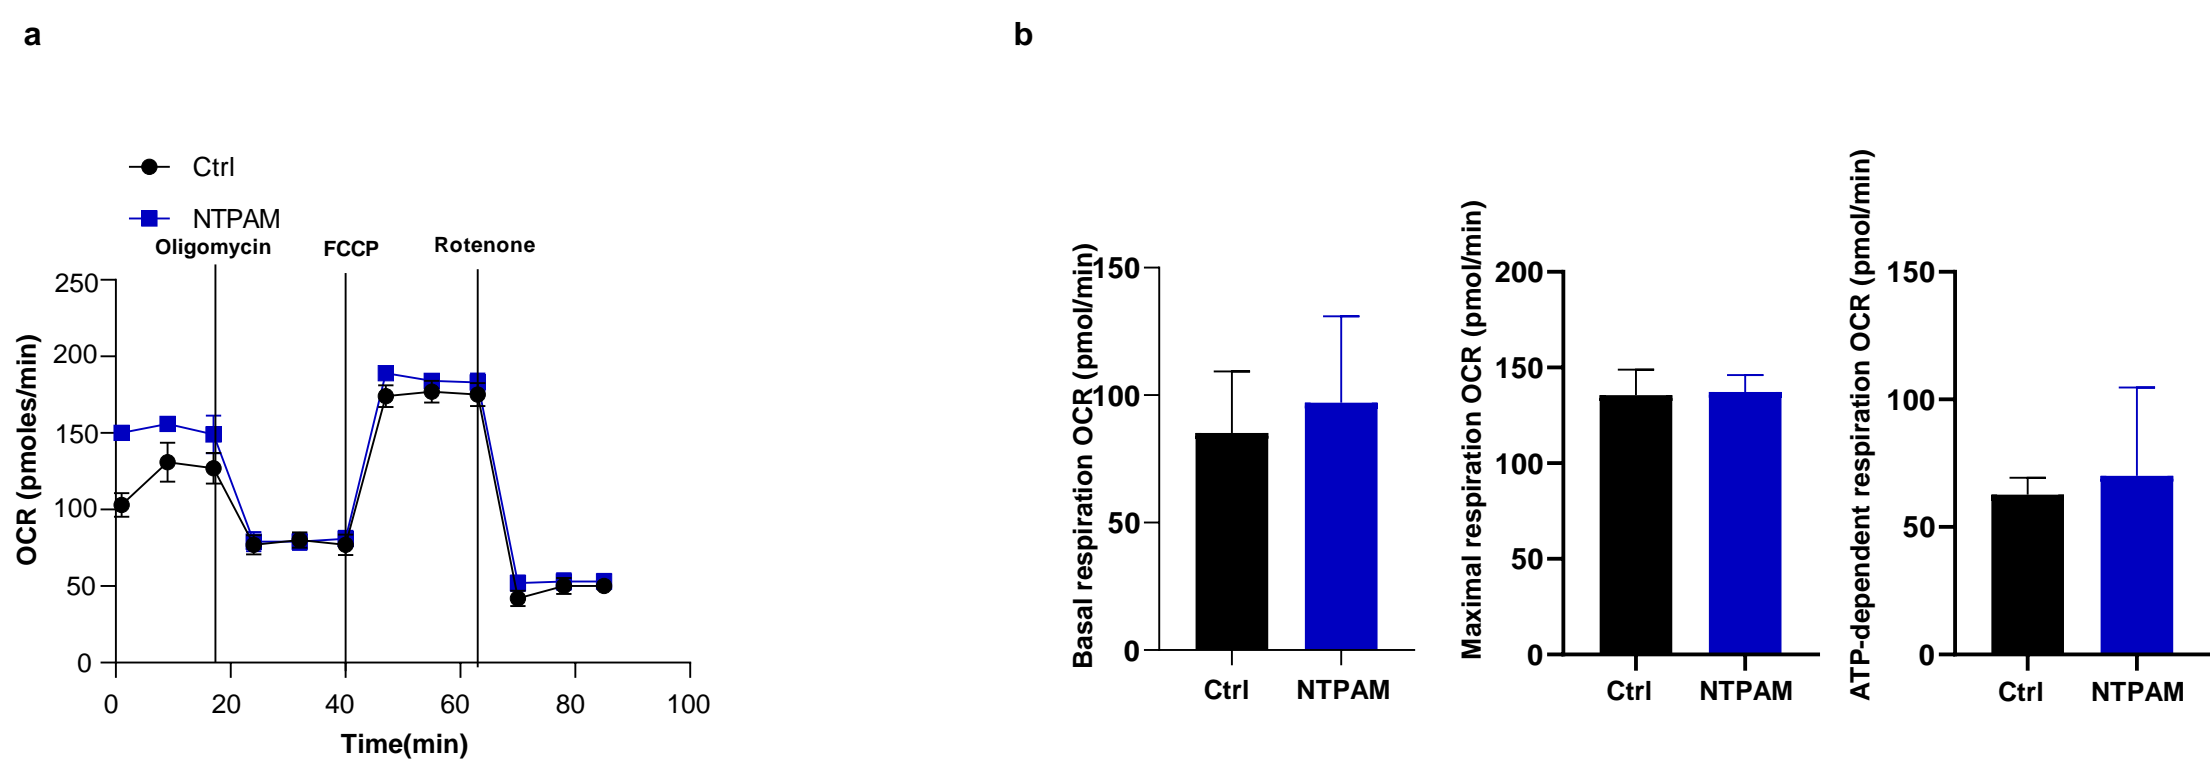

**Figure S2. Oxygen consumption rate (OCR) measurement in human fibroblasts after NTPAM treatment.** (a)(b) There was no significant change in OCR after NTPAM treatment in human fibroblast.
